# Supplementary material
Source: PubMed Central journal article supplement (PMC2922182)
Supplement: 1003747107_pnas.201003747SI.pdf [file 1003747107_pnas.201003747SI.pdf]

# Supporting Information

Foster et al. 10.1073/pnas.1003747107

## SI Experimental Procedures

To measure T cell proliferation, spleens from wild-type (Ephrin-B2<sup>+/+</sup>) and mutant (Ephrin-B2<sup>Lx/Lx</sup>;Wnt1-Cre) adult mice were dissected and mashed through a cell strainer; 10<sup>8</sup> cells were stained with CD19, B220, Ter119, Mac1, NK1.1, CD11c, TCRγδ, and Gr1 biotinylated antibodies (eBiosciences) before incubating with streptavidin-conjugated Dynabeads (Invitrogen). T cells

were purified by three rounds of magnetic-separation steps and stained with carboxy fluorescein diacetate succinimidyl ester (CFSE; Invitrogen); 5 × 10<sup>6</sup> cells were incubated with plate-bound anti-CD3 (10 μg/mL) and CD28 (2 μg/mL) for 72 h before flow-cytometric analyses. Cells were first gated for CD4 and CD8 expression, and the fluorescence intensity of CFSE was plotted on a histogram (FlowJo).

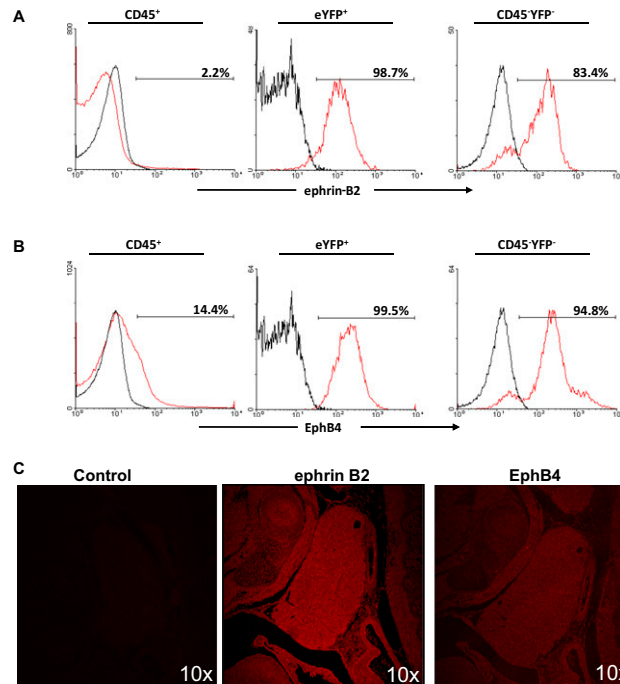

**Fig. S1.** Expression of ephrin ligands and Eph receptors on neural crest (NC)-derived mesenchyme and thymic epithelial cells (TECs). Thymus lobes from E15.5 *Wnt1-Cre;Rosa26<sup>eYFP</sup>* embryos were digested with collagenase, stained with antibodies recognizing CD45, ephrin-B2, and EphB4, and analyzed by flow cytometry. Cells were first-gated CD45<sup>+</sup> (thymocytes) (A Left and B Left), enhanced YFP (eYFP<sup>+</sup>; NC-derived) (A Center and B Center), or eYFP<sup>-</sup>CD45<sup>-</sup> (thymic epithelium) (A Right and B Right) cells and were further analyzed for expression of ephrin-B2 (A) and EphB4 (B). Red line, specific antibody; black line, isotype control. Two mice of each genotype were analyzed, giving similar results. Embryos from E15.5 were stained with anti-ephrin B2 and EphB4 (C) antibodies, and representative confocal images are shown.









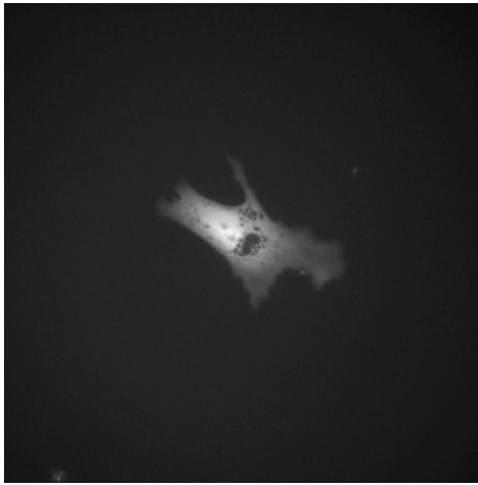

**Movie S2.** Time-lapse movie of cells depicted in Fig. 4B.

[Movie S2](#)

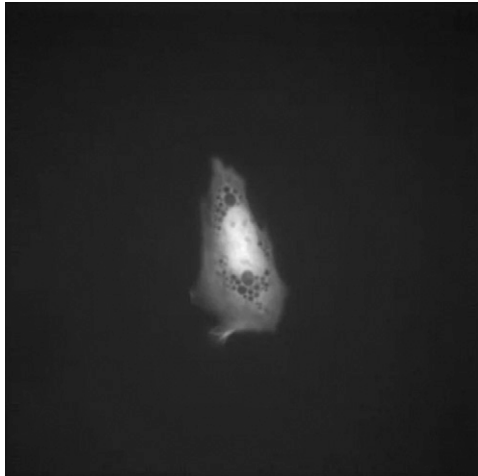

**Movie S3.** Time-lapse movie of cells depicted in Fig. 4C.

[Movie S3](#)
